# Supplementary material for: PKCι interacts with Rab14 and modulates epithelial barrier function through regulation of claudin-2 levels
Source: PubMed Central journal article supplement — Mol Biol Cell. 2015 Apr 15;26(8):1523–31. doi: 10.1091/mbc.E14-12-1613 (PMC4395131; doi:10.1091/mbc.e14-12-1613), 2015-04-15
Supplement: supp_E14-12-1613v1_CombinedSupMats.pdf [file supp_E14-12-1613v1_CombinedSupMats.pdf]

# Supplemental Materials

*Molecular Biology of the Cell*

Lu et al.

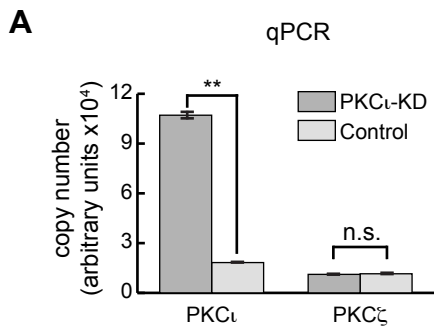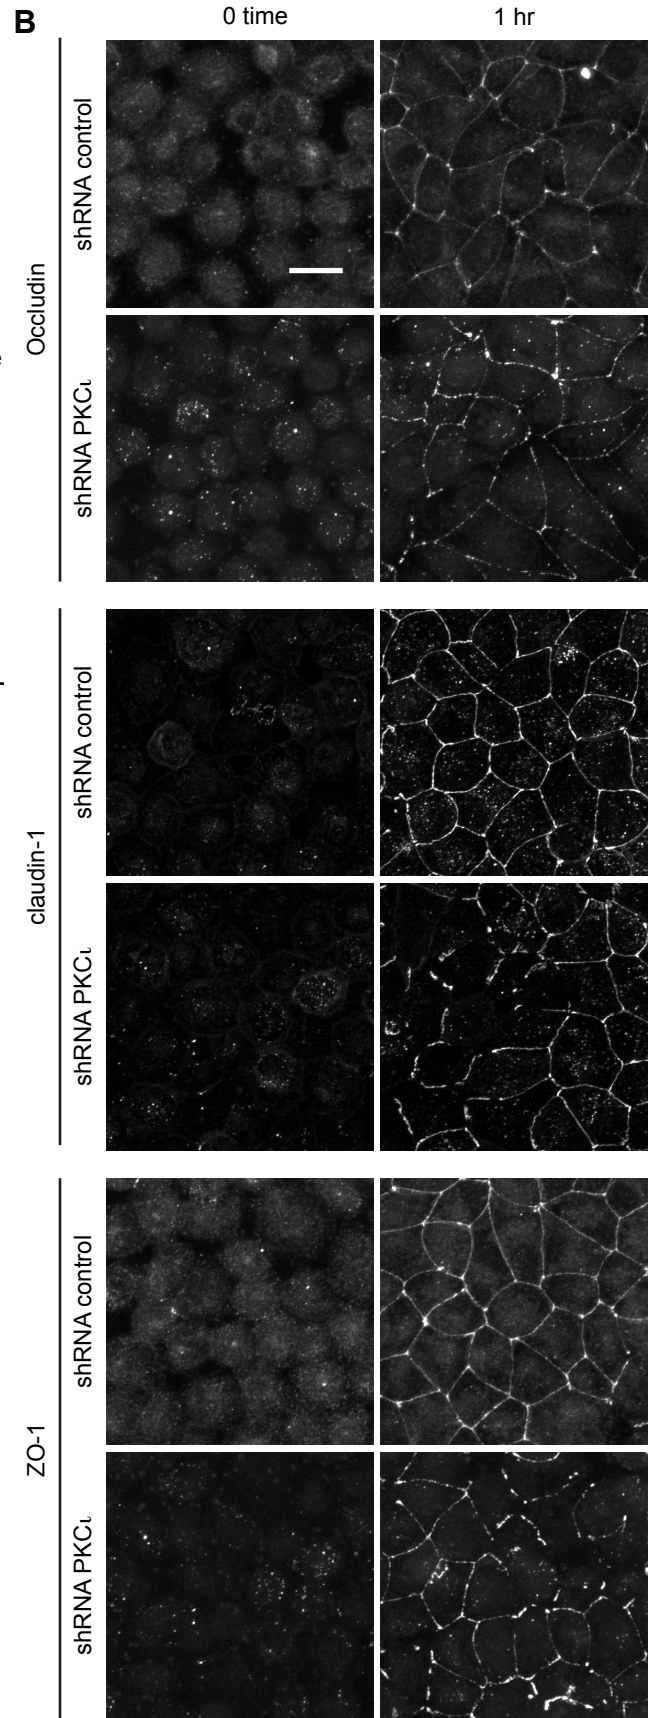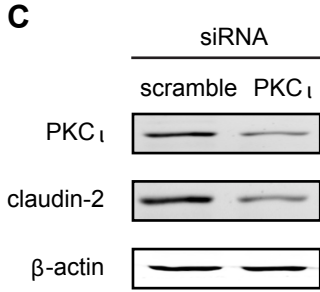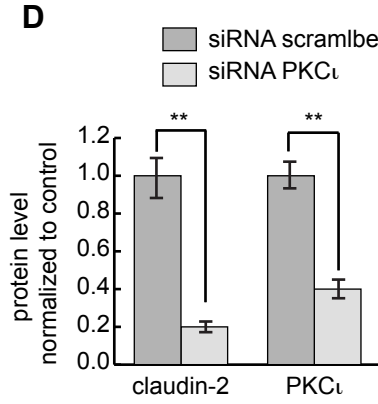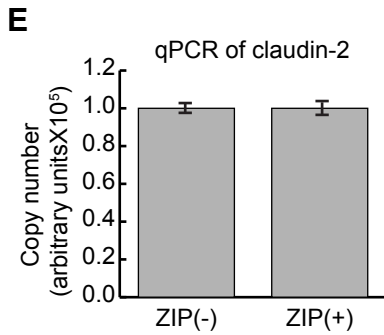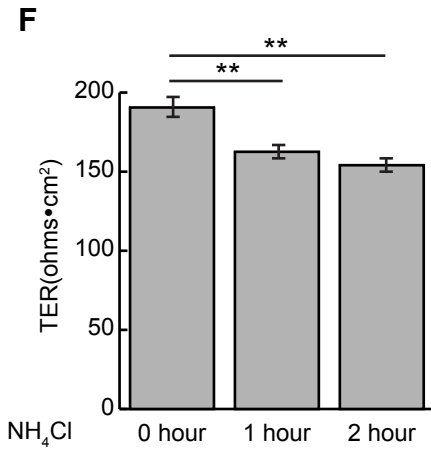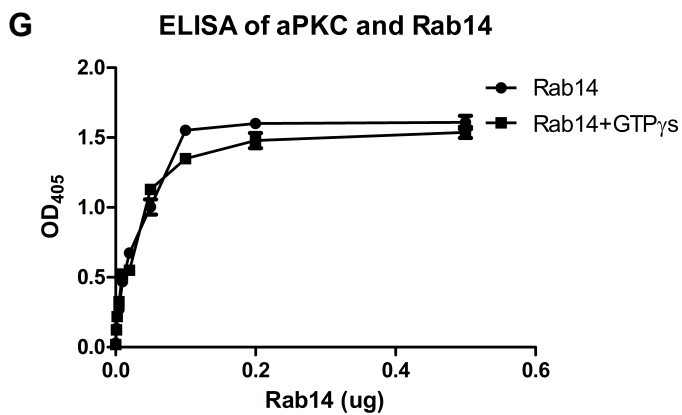

Supplemental Figure 1 A. shRNA-PKC $\iota$  reduces PKC $\iota$  mRNA levels but does not impact PKC $\zeta$  mRNA. qPCR shows that PKC $\iota$  mRNA level is reduced in PKC $\iota$  knockdown cells compared to control. However, the mRNA level of PKC $\zeta$  does not change. In addition, PKC $\iota$  is expressed at more than ten-fold higher levels than PKC $\zeta$ , no significant difference. B. PKC $\iota$  reduction delays the reassembly of tight junctions after calcium switch. Occludin, claudin-1 and ZO-1 labeling was assessed after calcium switch. These proteins are targeted to the junctions more slowly in PKC $\iota$ -KD cells. Scale bar, 10  $\mu$ m. C. MDCK cells were transfected with siRNA against PKC $\iota$  or scrambled siRNA and blotted for indicated proteins.  $\beta$ -actin was used as loading control. D. Quantification of protein levels in image. Graph represents the 3 repeats of the siRNA knockdown experiments and SEM was obtained from three replicates loading in each experiment.  $**p < 0.001$ . E. ZIP treatment does not impact message levels for claudin-2. F. Incubation of PKC $\iota$  knockdown cells with NH $_4$ Cl complements some of the increase in TER.  $**p < 0.001$ . G. Interaction of PKC $\iota$  and Rab14 *in vitro* is GTP independent. Pre-incubation of Rab14 with GTP $\gamma$ S does not change the affinity of the PKC $\iota$  and Rab14 interaction.
